# Supplementary material
Source: publisher figshare collection journal article supplement (https://future-science-group.figshare.com/ndownloader/files/35303650)

**SUPPLEMENTARY APPENDIX**

Supplementary Figure S1. Histogram of PD-L1 expression based on CPS in the overall cohort (*N* = 574). CPS, combined positive score; PD-L1, programmed death ligand 1.


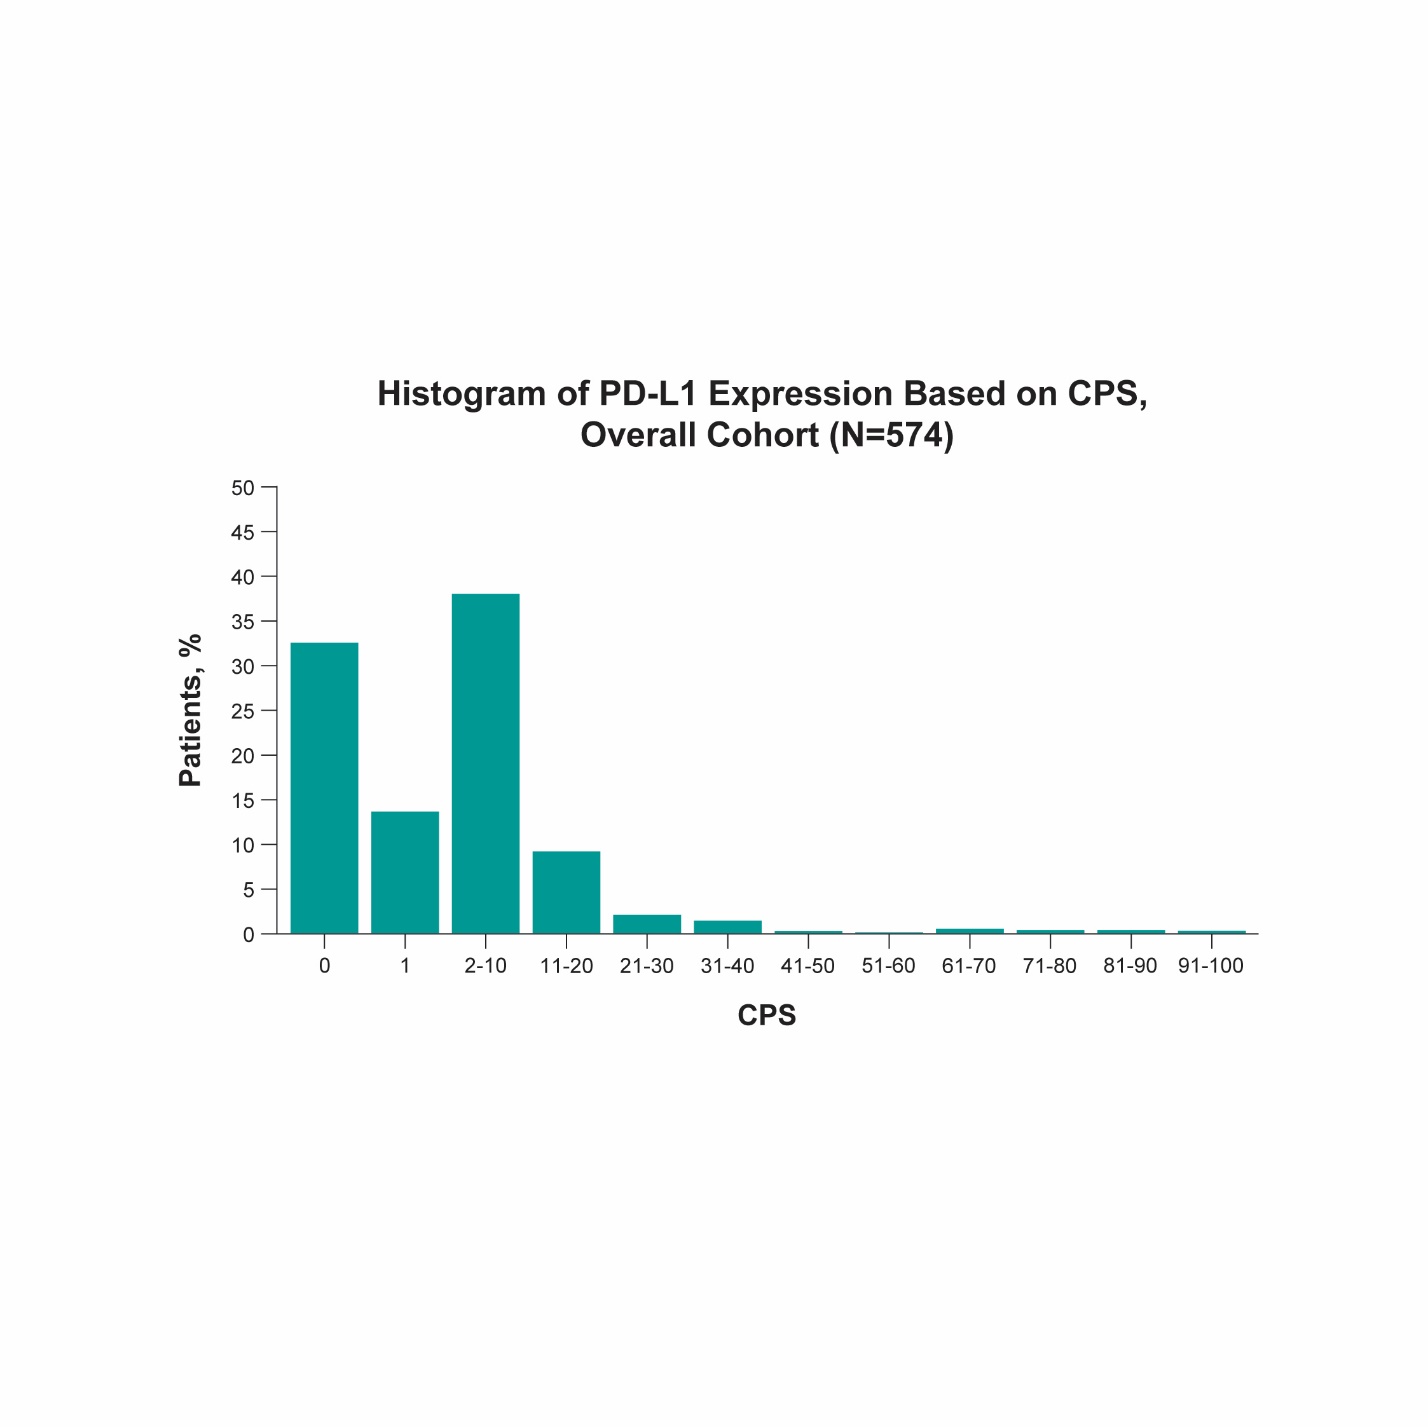


Supplementary Figure S2. OS by PD-L1 expression in (**A**) South Korean patients by disease stage and (**B**) US patients by disease stage. OS, overall survival; PD-L1, programmed death ligand 1.


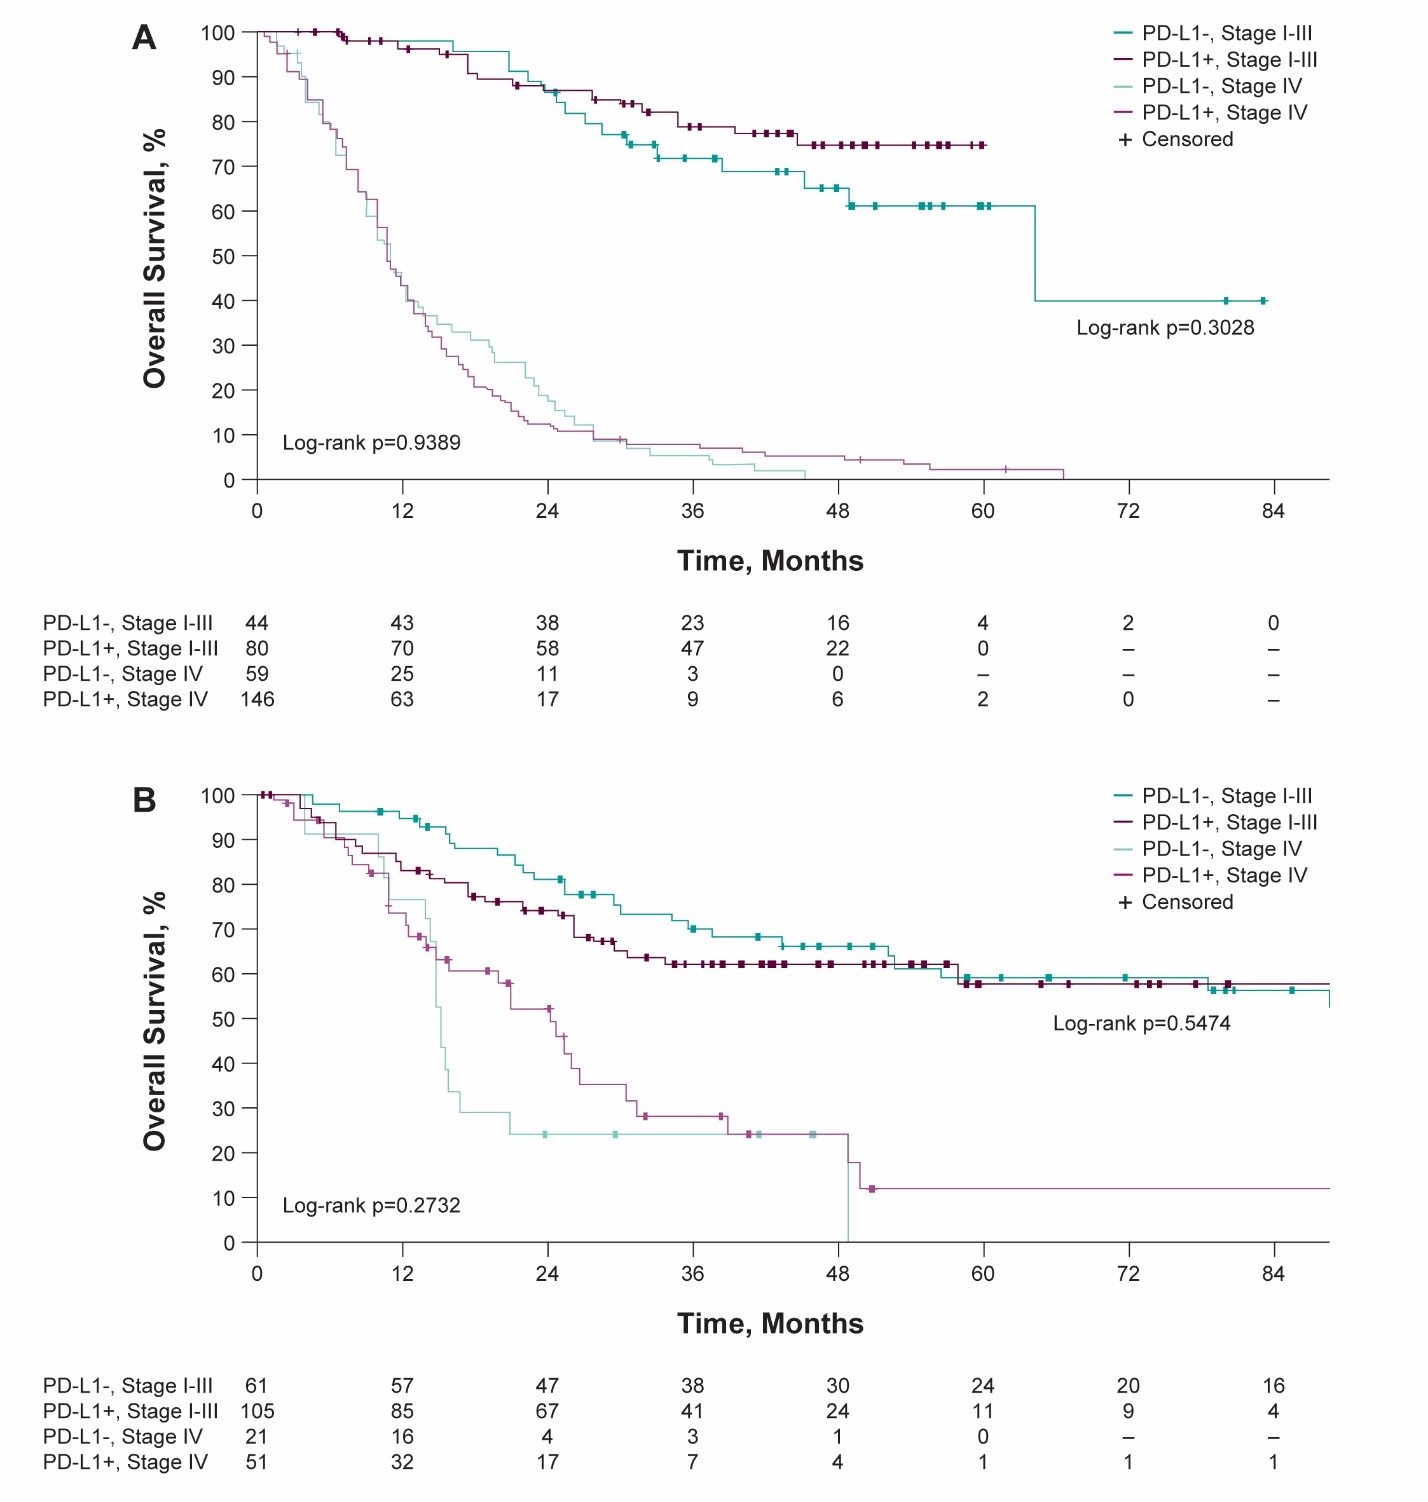


Supplementary Figure S3.OS by PD-L1 expression using a CPS cutoff of 10 for (**A**) all patients (*n* = 574), (**B**) stage I-III patients (*n* = 290) and stage IV patients (*n* = 277). CPS, combined positive score; PD-L1, programmed death ligand 1.


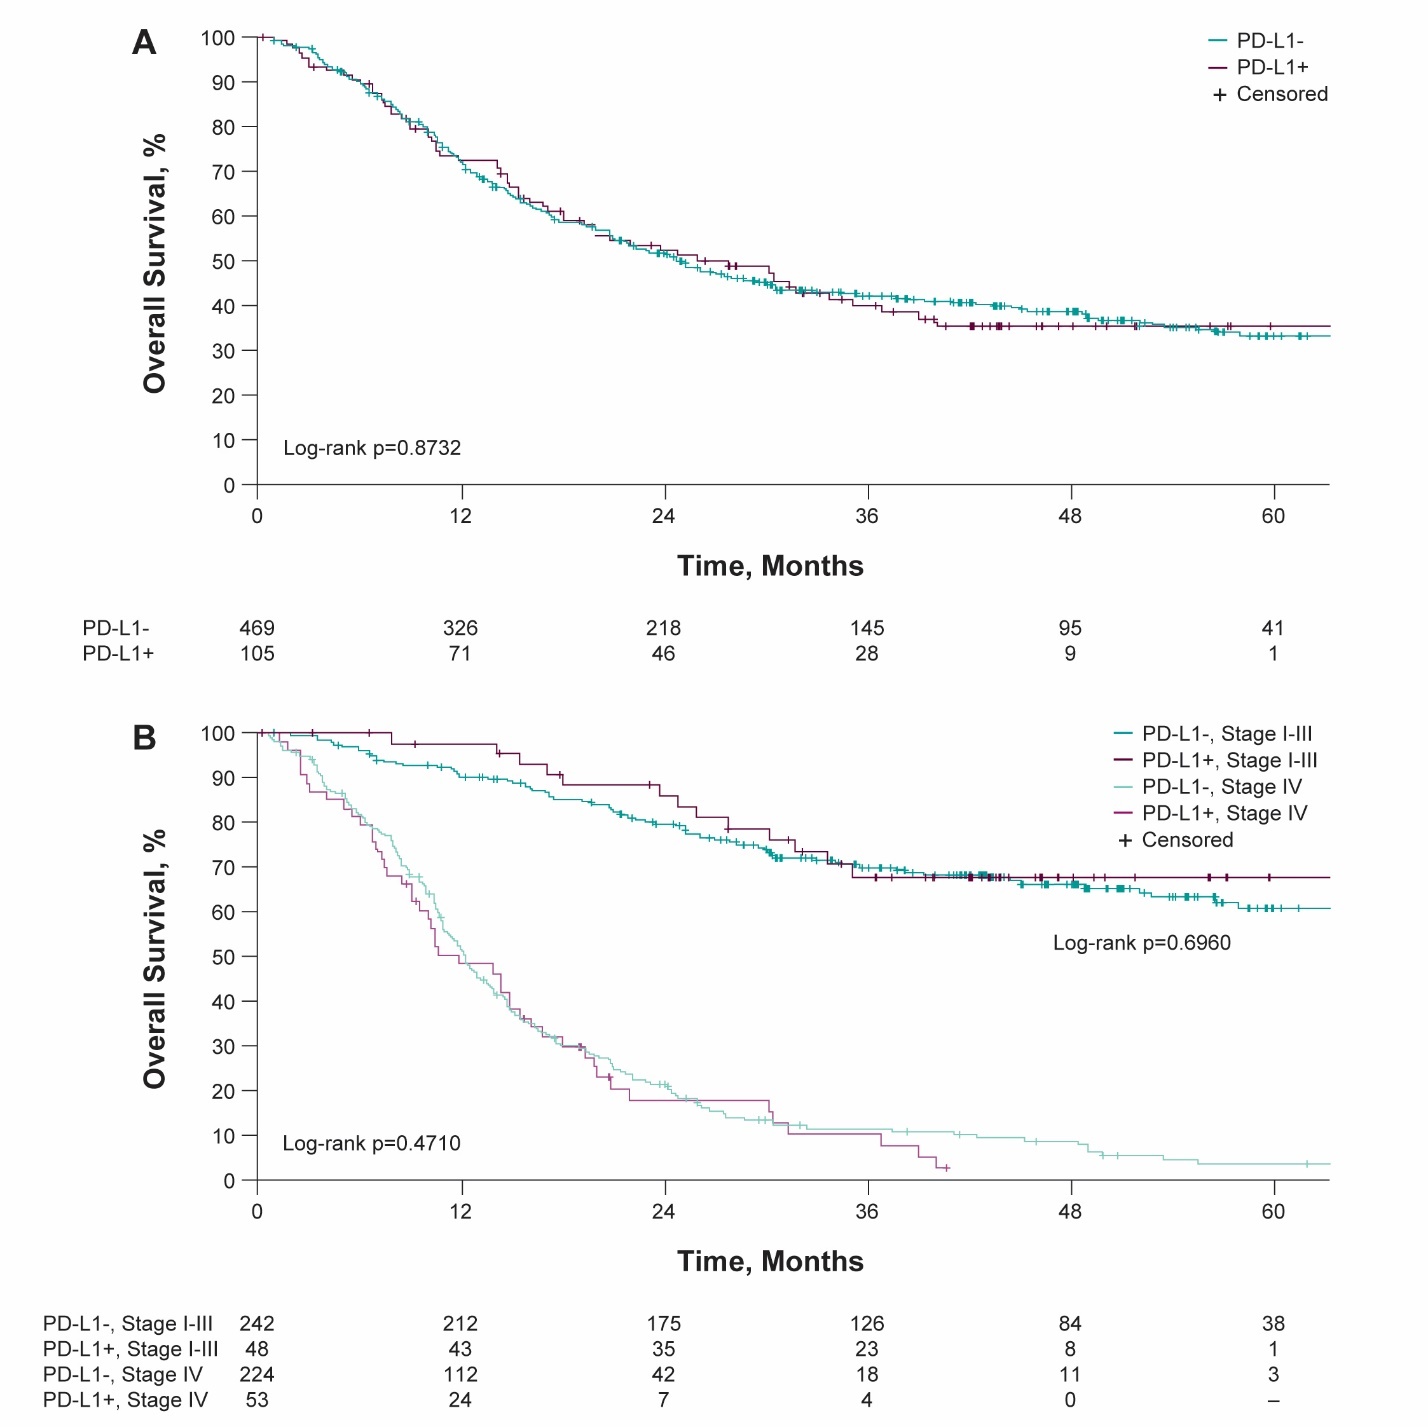


Supplementary Figure S4. GEP score for all patients and by (**A**) stage and (**B**) tissue type. GEP, gene expression profile.


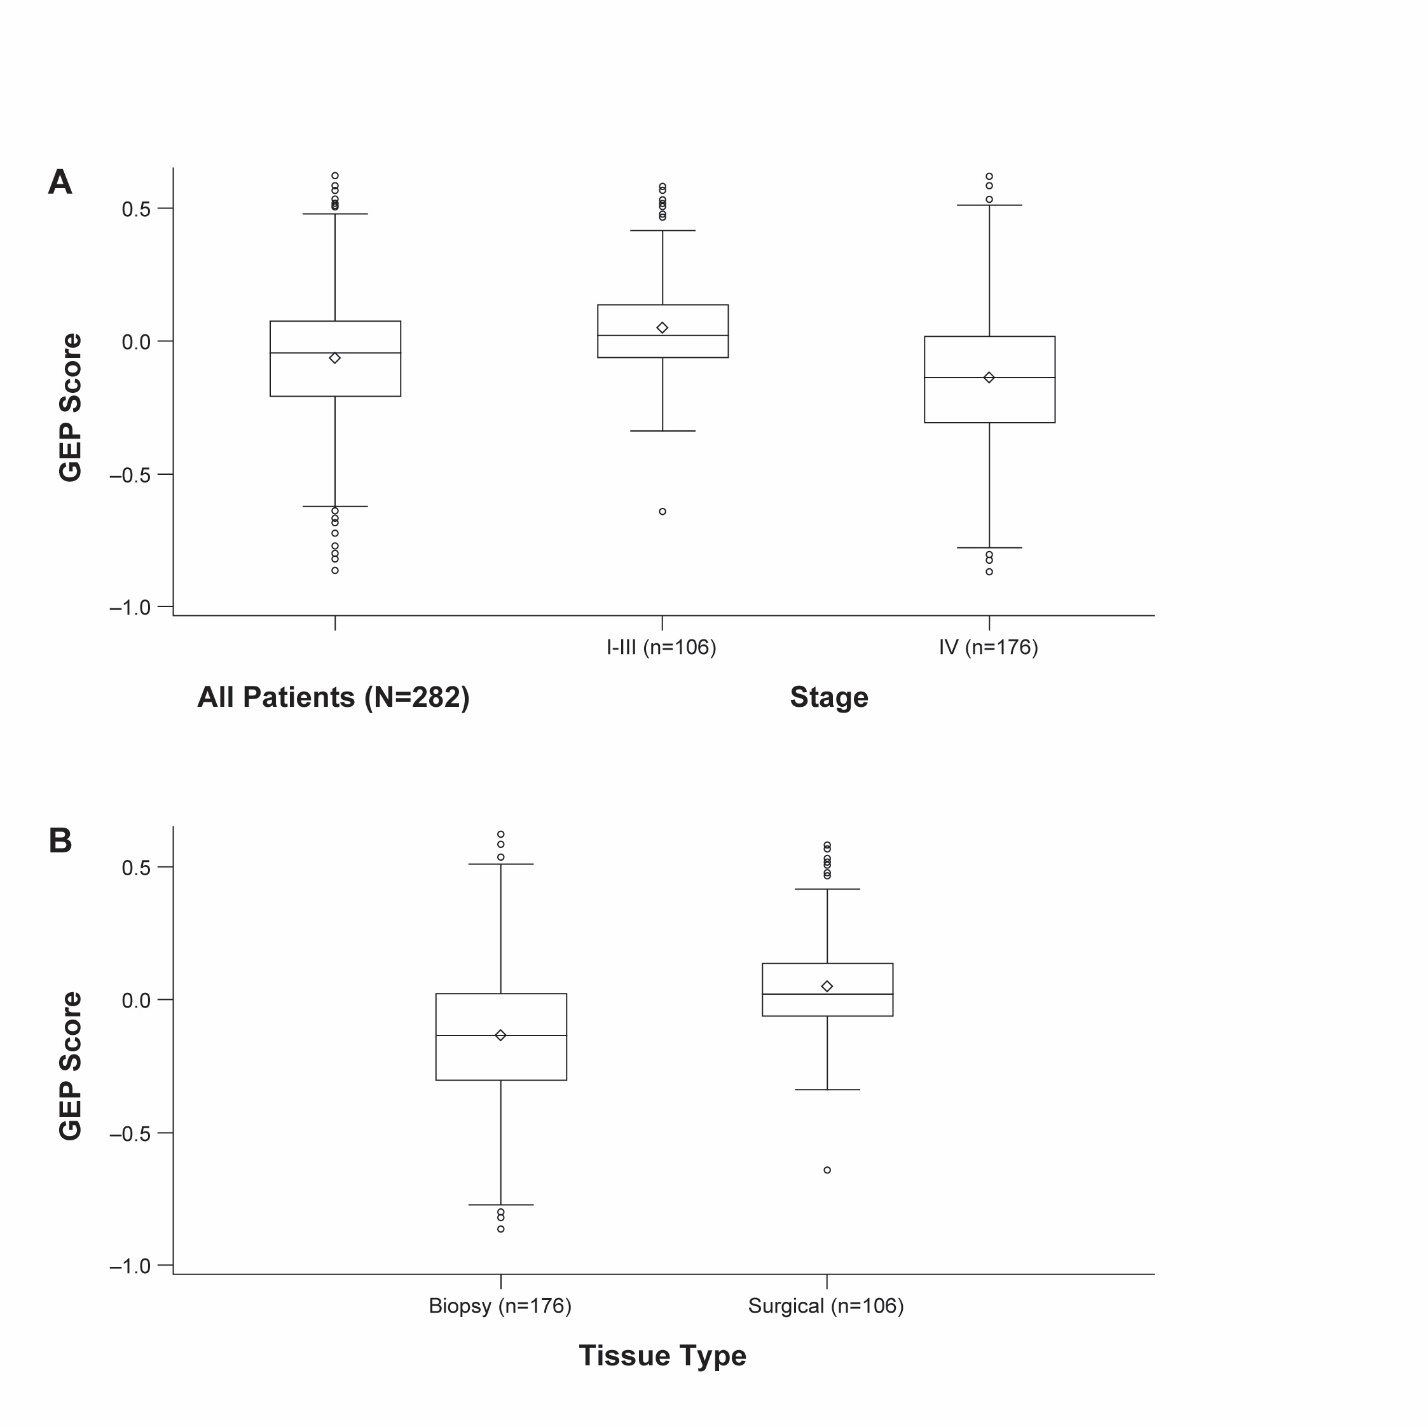

Supplement: Supplementary file 1 [file 35303650]
